# Supplementary material for: High-intensity and moderate-intensity interval training in heart failure with preserved ejection fraction: A meta-analysis of randomized controlled trials
Source: PubMed Central journal article supplement — Medicine (Baltimore). 2023 Feb 22;102(8):e33010. doi: 10.1097/MD.0000000000033010 (PMC11309679; doi:10.1097/md.0000000000033010), 2023-02-22
Supplement: medi-102-e33010-s001.pdf [file medi-102-e33010-s001.pdf]

| <b>Database</b>           | <b>Search strategies</b>                                                                                                                                                                                                                  |
|---------------------------|-------------------------------------------------------------------------------------------------------------------------------------------------------------------------------------------------------------------------------------------|
| <b>Pubmed Medline</b>     | Title “HF” or “diastolic HF” or “heart failure with preserved ejection fraction” or “HF with normal EF” and title “exercise training” or “aerobic exercise” or “isometric exercises” or “physical activity” or “cardiac rehabilitation”.  |
| <b>EMBASE</b>             | Keyword: HF or diastolic HF or heart failure with preserved ejection fraction or HF with normal EF and exercise training or aerobic exercise or isometric exercises or physical activity or cardiac rehabilitation                        |
| <b>Web of Science</b>     | Topic: “HF” or “diastolic HF” or “heart failure with preserved ejection fraction” or “HF with normal EF” and topic “exercise training” or “aerobic exercise” or “isometric exercises” or “physical activity” or “cardiac rehabilitation”. |
| <b>Cochrane databases</b> | Keyword: “HF or diastolic HF or heart failure with preserved ejection fraction or HF with normal EF and exercise training or aerobic exercise or isometric exercises or physical activity or cardiac rehabilitation.”                     |

Supplement 1. Search strategies for each database.
