# Supplementary material for: High-intensity and moderate-intensity interval training in heart failure with preserved ejection fraction: A meta-analysis of randomized controlled trials
Source: PubMed Central journal article supplement — Medicine (Baltimore). 2023 Feb 22;102(8):e33010. doi: 10.1097/MD.0000000000033010 (PMC11309679; doi:10.1097/md.0000000000033010), 2023-02-22
Supplement: medi-102-e33010-s002.pdf [file medi-102-e33010-s002.pdf]

| PMID     | Author and year              | Title of paper                                                                                                                                                                                                        | Reason for exclusion                                |
|----------|------------------------------|-----------------------------------------------------------------------------------------------------------------------------------------------------------------------------------------------------------------------|-----------------------------------------------------|
| 15252410 | Gary, R. A. et al<br>2004    | Home-based exercise improves functional performance and quality of life in women with diastolic heart failure                                                                                                         | No high intensity physical activity                 |
| 16863044 | Gary, R.<br>2006             | Exercise self-efficacy in older women with diastolic heart failure: results of a walking program and education intervention                                                                                           | No high intensity physical activity                 |
| 19641843 | Karapolat, H. et al<br>2009  | Comparison of hospital-based versus home-based exercise training in patients with heart failure: effects on functional capacity, quality of life, psychological symptoms, and hemodynamic parameters                  | No high intensity physical activity                 |
| 20852060 | Kitzman, D. W. et al<br>2010 | Exercise training in older patients with heart failure and preserved ejection fraction: a randomized, controlled, single-blind trial                                                                                  | No high intensity physical activity                 |
| 21996391 | Edelmann, F. et al<br>2011   | Exercise training improves exercise capacity and diastolic function in patients with heart failure with preserved ejection fraction: results of the Ex-DHF (Exercise training in Diastolic Heart Failure) pilot study | No high intensity physical activity                 |
| 22005747 | Alves, A. J. et al<br>2012   | Exercise training improves diastolic function in heart failure patients                                                                                                                                               | No high intensity physical activity                 |
| 22536936 | Murad, K. et al<br>2012      | Exercise training improves heart rate variability in older patients with heart failure: a randomized, controlled, single-blinded trial                                                                                | Involves hfref, no high intensity physical activity |
| 22536983 | Smart, N. et al<br>2012      | Exercise training in heart failure with preserved systolic function: a randomized controlled trial of the effects on cardiac function and functional capacity                                                         | No high intensity physical activity                 |
| 23665370 | Kitzman, D. W. et al<br>2013 | Effect of endurance exercise training on endothelial function and arterial stiffness in older patients with heart failure and preserved ejection fraction: a randomized, controlled, single-blind trial               | No high intensity physical activity                 |
| 23185084 | Rustad, L. A. et al<br>2014  | One year of high-intensity interval training improves exercise capacity, but not left ventricular function in stable heart transplant recipients: a randomised controlled trial                                       | NO hfpef patients                                   |
| 25354950 | Suchy, C. et al              | Optimising exercise training in prevention and treatment of diastolic heart failure (OptimEx-CLIN): rationale and                                                                                                     | No high intensity                                   |

|          |                             |                                                                                                                                                                           |                                                     |
|----------|-----------------------------|---------------------------------------------------------------------------------------------------------------------------------------------------------------------------|-----------------------------------------------------|
|          | 2014                        | design of a prospective, randomised, controlled trial                                                                                                                     | physical activity                                   |
| 24627449 | Nolte, K. et al<br>2015     | Effects of exercise training on different quality of life dimensions in heart failure with preserved ejection fraction: the Ex-DHF-P trial                                | No high intensity physical activity                 |
| 28338229 | Pandey, A. et al<br>2017    | Response to Endurance Exercise Training in Older Adults with Heart Failure with Preserved or Reduced Ejection Fraction                                                    | No high intensity physical activity                 |
| 28516519 | Edelmann, F. et al<br>2017  | Exercise training in diastolic heart failure (Ex-DHF): rationale and design of a multicentre, prospective, randomized, controlled, parallel group trial                   | Involves hhref, no high intensity physical activity |
| 32604218 | Brubaker P.H. et al<br>2020 | Exercise training effects on the relationship of physical function and health-related quality of life among older heart failure patients with preserved ejection fraction | No high intensity physical activity                 |

---
